# Supplementary material for: Enzyme-containing double layer polymersomes coated by erythrocytes as a biomimetic nanoscavengers for in vivo protection from toxicants
Source: Royal Society of Chemistry journal article supplement (doi:10.1039/d5ma00894h), 2025-01-01
Supplement: d5ma00894h1.pdf [file d5ma00894h1.pdf]

## Supplementary information

for

### Enzyme-containing double layer polymersomes coated by erythrocytes as a biomimetic nanoscavengers for in vivo protection from toxicants

Tatiana Pashirova, <sup>\*a,b</sup> Dmitry Tatarinov, <sup>b†</sup> Zukhra Shaihutdinova, <sup>a,b</sup> Albina Malanyeva, <sup>a</sup> Olga Vasileva, <sup>a</sup> Alexey Rogov, <sup>a</sup> Vladimir Evtjugin, <sup>a</sup> Andrey Nemtarev, <sup>b</sup> Aida Gabdoulkhakova, <sup>a</sup> Eric Chabrière, <sup>c,d</sup> Pauline Jacquet, <sup>d</sup> David Daudé <sup>d</sup> and Patrick Masson <sup>\*a</sup>

<sup>a</sup>*Institute of Fundamental Medicine and Biology, Kazan Federal University, 420008 Kazan, 18 Kremlyovskaya St., Russian Federation*

<sup>b</sup>*Arbuzov Institute of Organic and Physical Chemistry, FRC Kazan Scientific Center of RAS, Arbuzov Str. 8, 420088 Kazan, Russian Federation*

<sup>c</sup>*Aix Marseille Univ, IRD, APHM, MEPHI, IHU-Méditerranée Infection, 19-21 Boulevard Jean Moulin, 13005 Marseille, France*

<sup>d</sup>*Gene&GreenTK, 19–21 Boulevard Jean Moulin, 13005 Marseille, France*

\*Corresponding authors

Tatiana Pashirova, Arbuzov Institute of Organic and Physical Chemistry, FRC Kazan Scientific Center of RAS, Arbuzovstr. 8, Kazan, 420088, Russian Federation, tel: (007) 843 272 73 84, fax: (007) 843 273 22 53,

E-mail: [tatyana\\_pashirova@mail.ru](mailto:tatyana_pashirova@mail.ru)

Patrick Masson, Institute of Fundamental Medicine and Biology, Kazan Federal University, 18 Kremlyovskaya St., 420008 Kazan, Russian Federation

E-mail: [pym.masson@free.fr](mailto:pym.masson@free.fr); [pmasson@kpfu.ru](mailto:pmasson@kpfu.ru)

## Contents

|                                                                                                                                                                   |     |
|-------------------------------------------------------------------------------------------------------------------------------------------------------------------|-----|
| <b>Scheme S1.</b> General scheme of synthesis of block-copolymers.                                                                                                | S3  |
| <b>1.</b> Calculation the amount of blood required to cover PTE-polymersomes.                                                                                     | S4  |
| <b>Figure S1.</b> Screen shot of PTE-loaded polymersomes size distribution                                                                                        | S5  |
| <b>Figure S1.</b> TEM images of PTE-loaded polymersomes                                                                                                           | S6  |
| <b>Figure S3.</b> UV Absorbance spectra of PTE after ultracentrifugation of PTE-loaded polymersomes                                                               | S7  |
| <b>Figure S4.</b> Size distribution of PTE-loaded polymersomes based on di- and triblock copolymers                                                               | S8  |
| <b>Table S1.</b> Dynamic light scattering data for erythrocyte membrane-camouflaged polymersomes                                                                  | S9  |
| <b>Figure S5.</b> Size distribution of PTE-loaded polymersomes                                                                                                    | S10 |
| <b>Figure S6.</b> Size distribution for empty and PTE-loaded erythrocyte membrane-camouflaged polymersomes                                                        | S11 |
| <b>Figure S7.</b> Screen shot for size distribution and correlation curves empty and PTE-loaded polymersomes                                                      | S12 |
| <b>Figure S8.</b> TEM imaging of erythrocyte membrane-camouflaged PTE-polymersomes                                                                                | S13 |
| <b>Figure S9.</b> UV Absorbance spectra of PTE after ultracentrifugation of erythrocyte membrane-camouflaged PTE-polymersomes                                     | S14 |
| <b>Figure S10.</b> SEM imaging of erythrocyte coated PTE-polymersome microreactor                                                                                 | S15 |
| <b>Figure S11.</b> SEM imaging of erythrocyte coated PTE-polymersome microreactor                                                                                 | S16 |
| <b>Figure S12.</b> UV Absorbance spectra of PTE after ultracentrifugation of erythrocyte coated PTE-polymersomes microreactor                                     | S17 |
| <b>Figure S13.</b> UV Absorbance spectra of PTE release from erythrocyte coated PTE-polymersome microreactor                                                      | S18 |
| <b>Figure S14.</b> Kinetic curves of POX hydrolysis by PTE                                                                                                        | S19 |
| <b>Figure S15.</b> Dependences of POX hydrolysis by PTE                                                                                                           | S20 |
| <b>Table S2.</b> Prophylaxis and post-exposure treatment of paraoxon <i>s.c.</i> acute toxicity by <i>i.v.</i> administration of PTE-loaded nanoreactors in mice. | S21 |
| <b>Figure S15.</b> Kinetics of the POX hydrolysis by erythrocyte coated PTE-polymersome microreactors in mouse plasma                                             | S22 |
| <b>Figure S17.</b> Pharmacokinetics of PTE in mouse plasma after <i>i.v.</i> injection of erythrocyte coated PTE-polymersome microreactors                        | S23 |

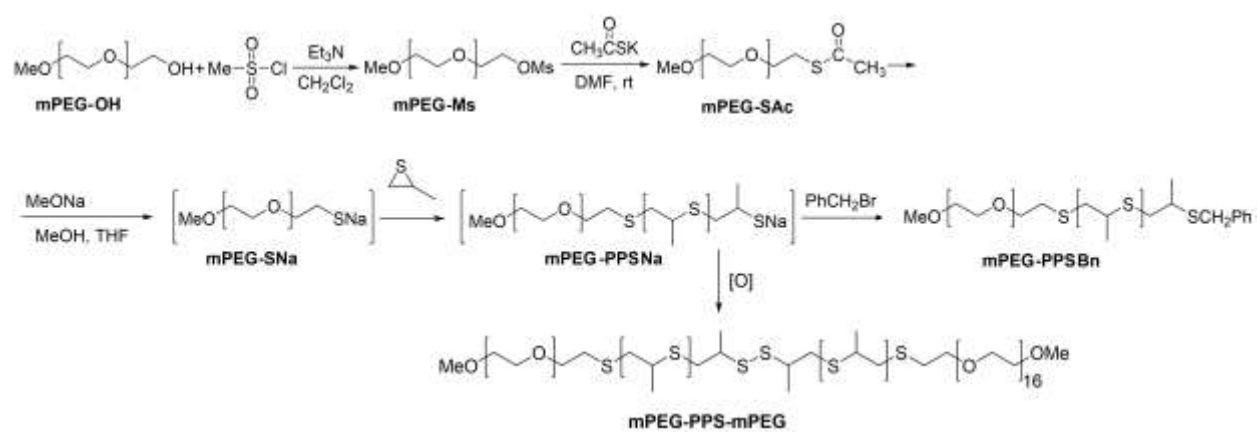

**Scheme S1.** General scheme of synthesis of block-copolymers

# 1. Calculation the amount of blood needed to coat PTE-polymersomes

Amount of erythrocytes needed to coat PTE-polymersomes were calculated according to [1]

Amount of erythrocytes in 1 ml of blood:  $N_{\text{eryt}} = 10^{10}$  cells/mL

Thickness of erythrocyte membrane  $th_{\text{eryt}} = 7.5$  nm

$S_{\text{eryt}}$  (Surface area of 1 erythrocyte) =  $75 \text{ mkm}^2$

$S_{\text{total-eryt}}$  (Surface area of all erythrocytes in 1 ml of blood) =  $N_{\text{eryt}} * S_{\text{eryt}} = 10^{10} \text{ cells/ml} * 75 \text{ mkm}^2 = 0.75 \text{ m}^2$

Radius of PTE-polymersomes  $r_{\text{NP}} = 80$  nm

Radius of erythrocyte membrane-camouflaged PTE-polymersomes  $r_{\text{NP-eryt}} = r_{\text{NP}} + th_{\text{eryt}} = 80 \text{ nm} + 7.5 \text{ nm} = 87.5 \text{ nm}$

Amount of PTE-polymersomes in 1 ml:  $N_{\text{NR}} = 1.78 * 10^{13}$  particles/ml [2]

$S_{\text{NP-eryt}}$  (surface area of 1 NP-eryt) =  $4 * \pi * (r_{\text{NP-eryt}})^2 = 4 * 3.14 * (87.5 \text{ nm})^2 = 0.96 * 10^{-13} \text{ m}^2$

$S_{\text{total-NP-eryt}}$  (surface area of all NP-eryt in 1 ml) =  $N_{\text{NR}} * S_{\text{NP-eryt}} = 1.78 * 10^{13} \text{ particles/ml} * 0.96 \text{ m}^2 = 1.71 \text{ m}^2$

Volume of blood needed to coat 1 ml of PTE-polymersomes:

$S_{\text{total-NP-eryt}} / S_{\text{total-eryt}} = 2.28$

2.28 ml of blood to coat 1 ml of PTE-polymersomes by erythrocytes is needed

| Ratio<br>PEG-PPS : erythrocytes | Amount of<br>PEG-PPS, mg | Amount of<br>Blood, ml |
|---------------------------------|--------------------------|------------------------|
| 1:0.1                           | 1                        | 0.046                  |
| 1:0.2                           | 1                        | 0.091                  |
| 1:0.3                           | 1                        | 0.137                  |
| 1:0.5                           | 1                        | 0.228                  |
| 1:1                             | 1                        | 0.456                  |

Ref.

[1] B.T. Luk, Ch.-M. J. Hu, R. H. Fang, D. Dehaini, C. Carpenter, W. Gao, Liangfang Zhang. Interfacial Interactions between Natural RBC Membranes and Synthetic Polymeric Nanoparticles, *Nanoscale*, 2014,6, 2730-2737.

[2] Pashirova T.N. et al., *Colloid journal* submitted.

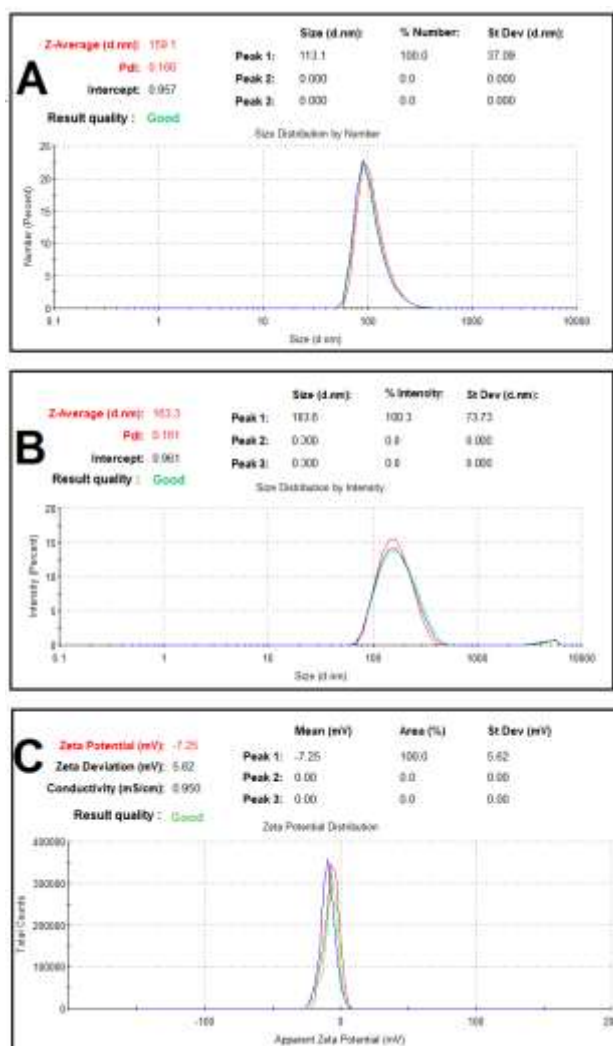

**Figure S1.** Screen shot of size distribution using the number (A) and intensity parameters (B) and dzeta-potential (C) of PTE-loaded polymersomes in 10 mM Tris buffer, pH = 7.4,  $C_1 = 5$  mg/mL, 25 °C.

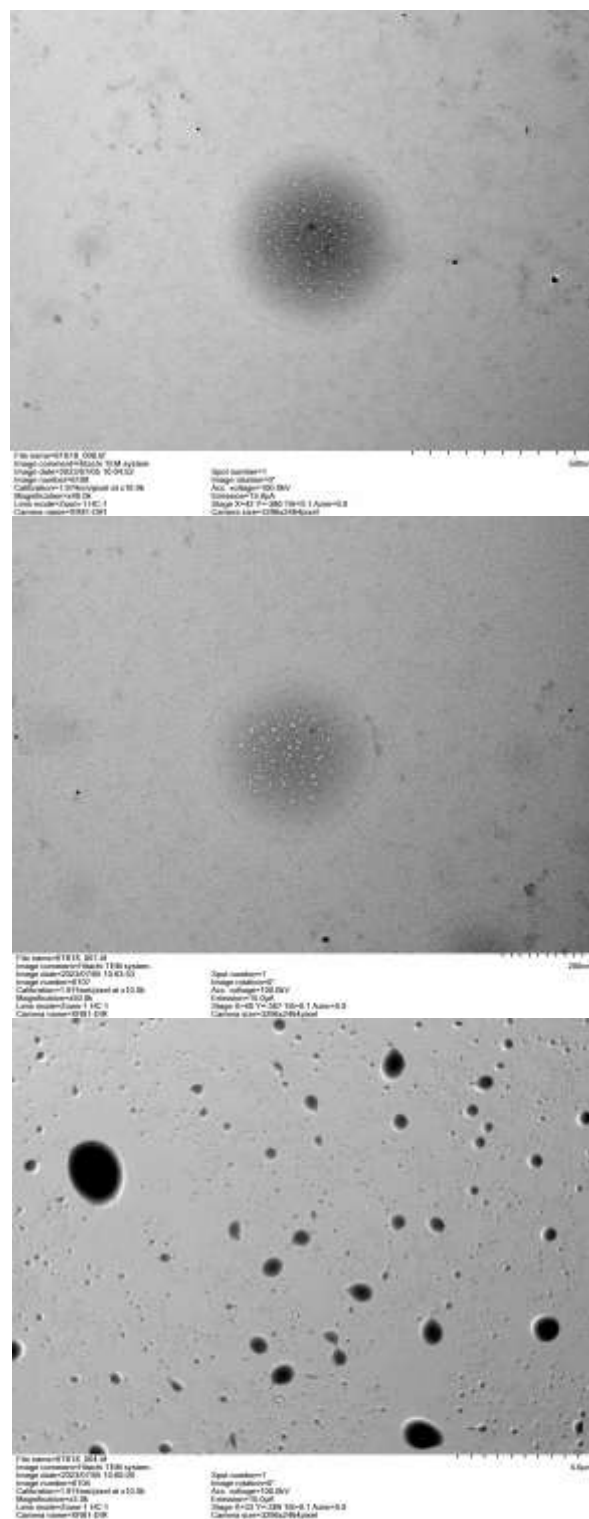

**Figure S2.** TEM imaging of PTE-loaded polymersomes in 10 mM Tris buffer, pH = 7.4,  $C_1 = 0.05 \mu\text{g/mL}$ , 25 °C.

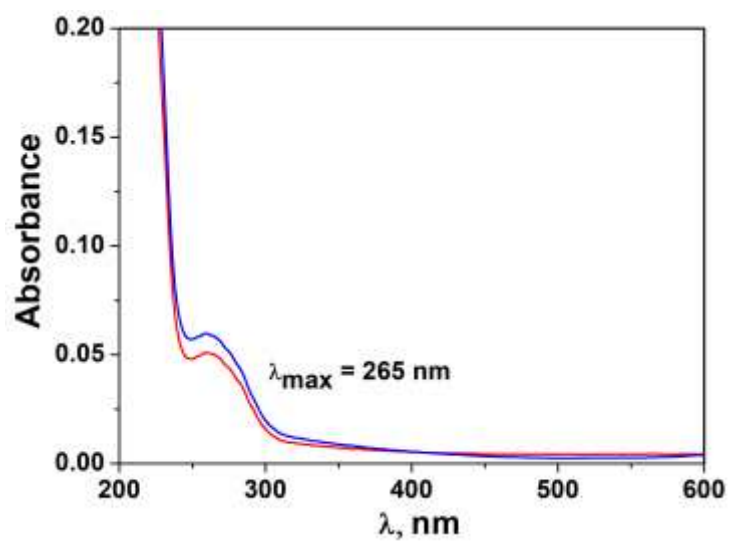

**Figure S3.** UV Absorbance spectra of PTE after ultracentrifugation of PTE-loaded polymersomes in 10mM Tris buffer, pH=7.4,  $C_1 = 5 \text{ mg/mL}$ ,  $25^\circ\text{C}$ .

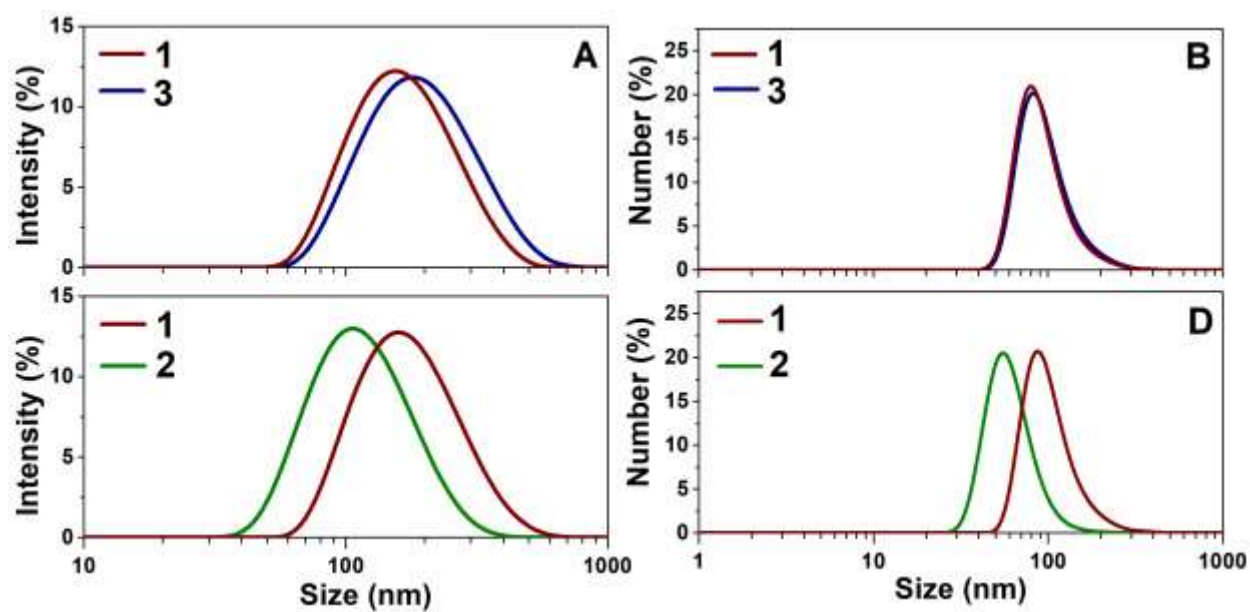

**Figure S4.** Size distribution of PTE-loaded polymersomes based on di- (1, PEG<sub>750</sub>; 2, PEG<sub>2000</sub>) and tri- (3, PEG<sub>750</sub>) block copolymers using intensity (A, C) and number (B, D) parameters,  $C_{\text{polymer}} = 10 \text{ mg/mL}$  (A, B) and  $5 \text{ mg/mL}$  (C, D),  $C_{\text{PTE}} = 25 \text{ } \mu\text{M}$  (A, B) and  $12.5 \text{ } \mu\text{M}$  (C, D),  $25^\circ\text{C}$ .



**Table S1.** Dynamic light scattering data for erythrocyte membrane-camouflaged polymersomes in 0.9% NaCl, pH = 7.4, 25 °C, size is hydrodynamic diameter, Z-average is the mean size, PDI is polydispersity index,  $\xi$  is zeta potential.

| Ratio<br>PEG-PPS 1:<br>erythrocytes | Diameter<br>(nm) |         | PDI         | $\xi$<br>(mV) |
|-------------------------------------|------------------|---------|-------------|---------------|
|                                     | Int              | Num     |             |               |
| 1:0.1                               | 142 ± 14         | 51 ± 9  | 0.25 ± 0.02 | -14.1 ± 0.4   |
| 1:0.3                               | 122 ± 13         | 51 ± 10 | 0.22 ± 0.01 | -13.7 ± 0.7   |
| 1:0.5                               | 122 ± 12         | 51 ± 11 | 0.27 ± 0.01 | -17.8 ± 0.7   |
| 1:1                                 | 122 ± 13         | 51 ± 11 | 0.22 ± 0.02 | -21.4 ± 1     |

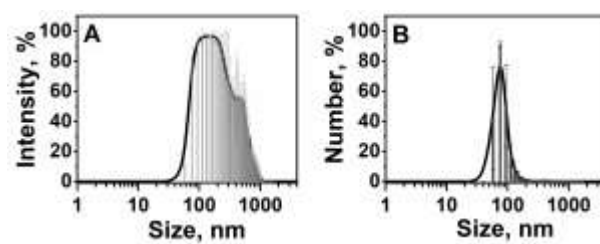

**Figure S5.** Size distribution of PTE-loaded polymersomes using intensity (A) and number (B) parameters in 10 mM Tris/NaCl (0.9%) buffer, pH = 7.4, 25 pH = 7.4,  $C_1 = 5$  mg/mL, 25 °C.

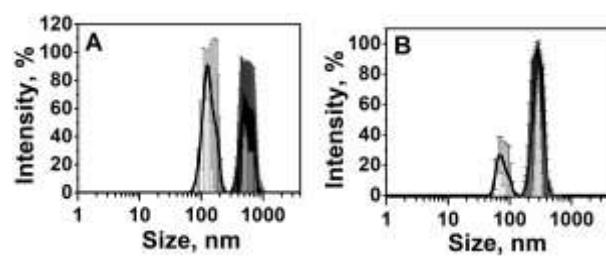

**Figure S6.** Size distribution using intensity parameter for empty (A) and PTE-loaded (B) erythrocyte membrane-camouflaged polymersomes in 10 mM Tris/NaCl (0.9%) buffer, pH = 7.4,  $C_1 = 5$  mg/mL, 25 °C.

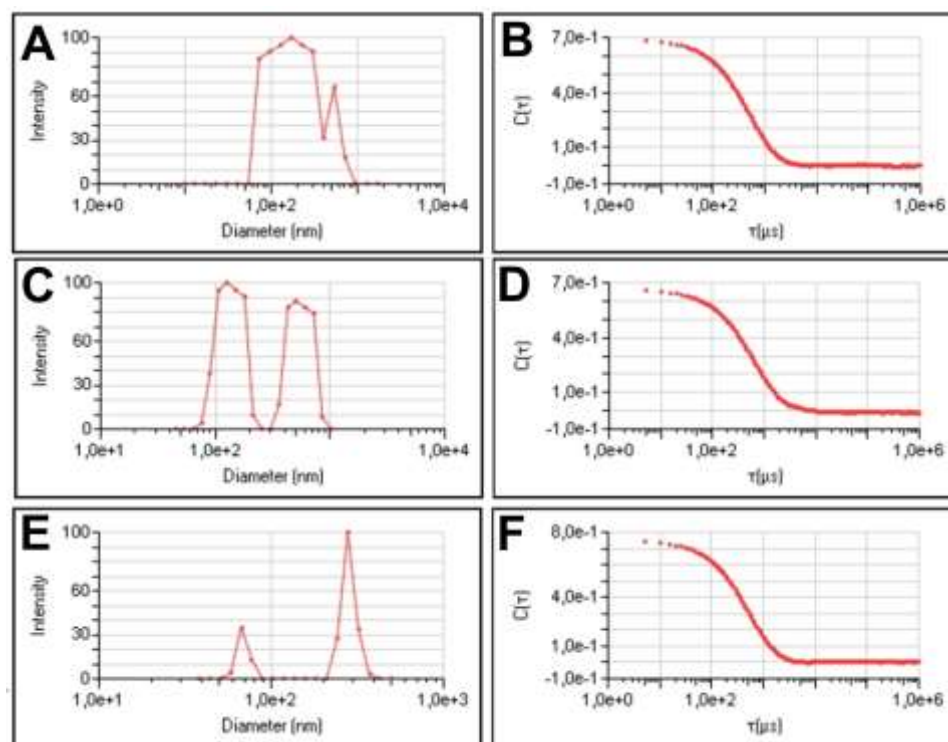

**Figure S7.** Screen shot for size distribution using intensity parameter (A,C,E) and correlation curves (B,D,F) for PTE-loaded polymersomes (A,B), empty (C,D) and PTE-loaded erythrocyte membrane-camouflaged polymersomes in 10 mM Tris/NaCl (0.9%) buffer,  $C_1 = 5$  mg/mL, pH = 7.4, 25 °C.

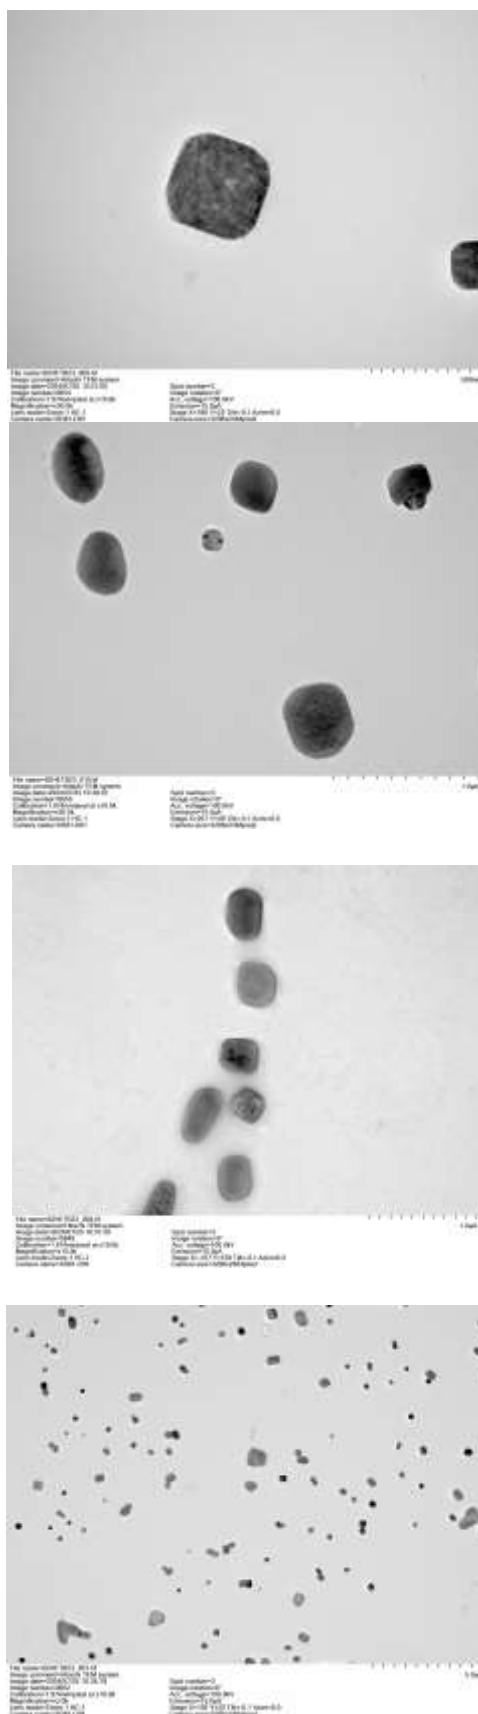

**Figure S8.** TEM imaging of erythrocyte membrane-camouflaged PTE-polymersomes in 0.9% NaCl,  $C_1 = 0.05 \mu\text{g/mL}$ ,  $25^\circ\text{C}$

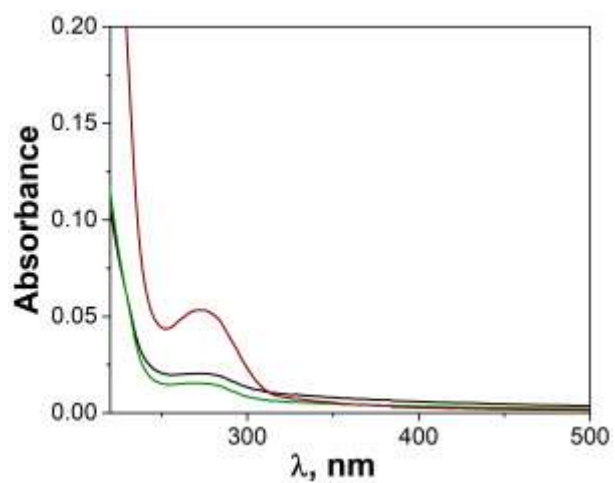

**Figure S9.** UV Absorbance spectra of PTE after ultracentrifugation of erythrocyte-modified PTE-polymersomes, 10 mM Tris/NaCl (0.9%) buffer, pH = 7.4,  $C_1 = 5$  mg/mL, 25 °C.

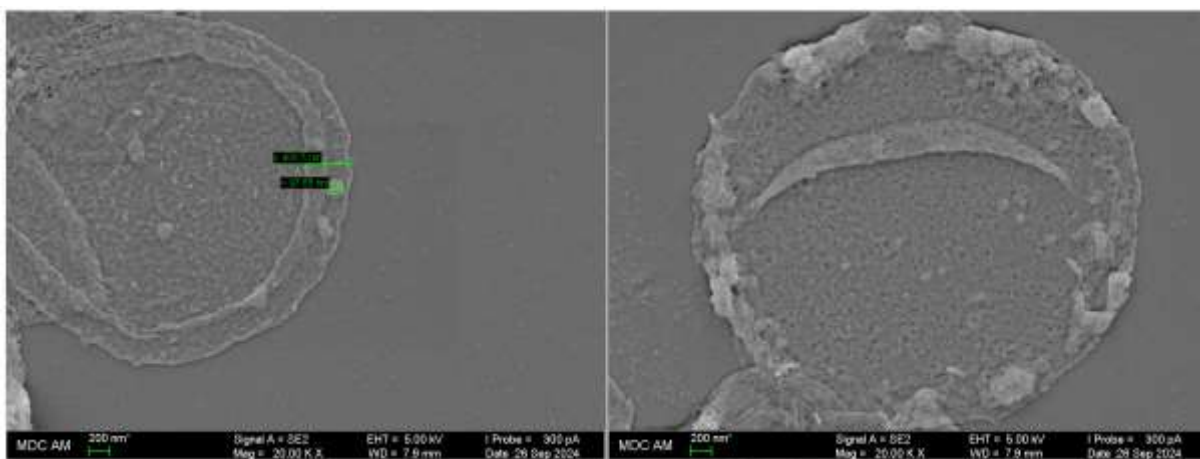

**Figure S10.** SEM imaging of erythrocyte coated PTE-polymersome microreactors in 0.9% NaCl,  $C_1 = 0.05 \mu\text{g/mL}$ , 25 °C.

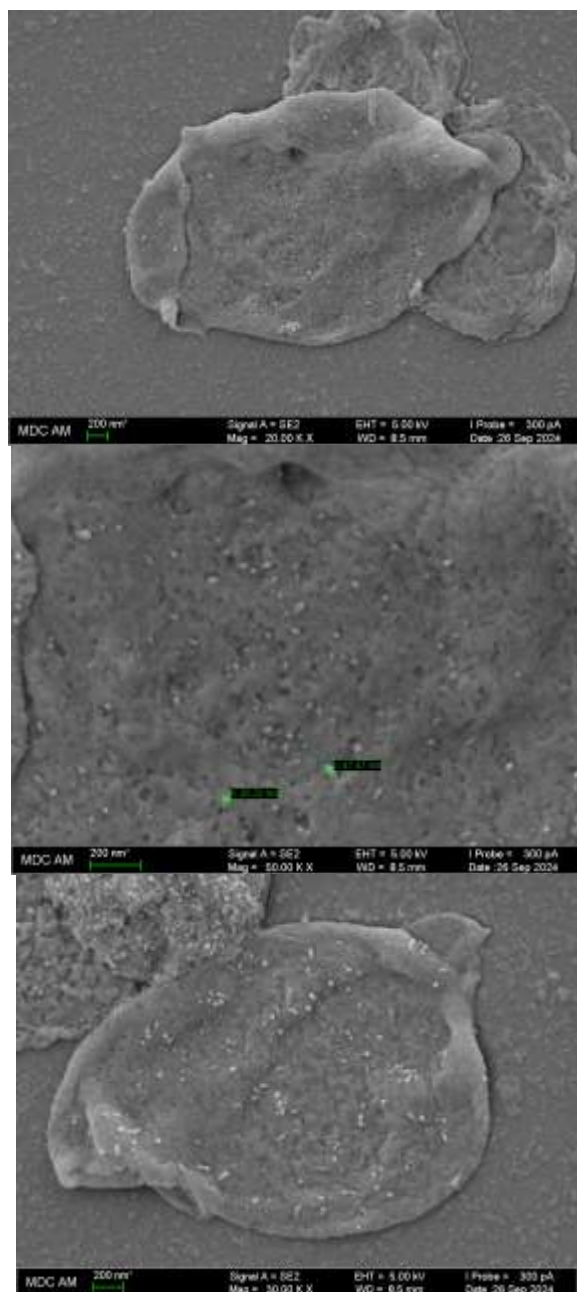

**Figure S11.** SEM imaging of erythrocyte coated PTE-polymersome microreactors in 0.9% NaCl,  $C_1 = 0.05 \mu\text{g/mL}$ , 25 °C.



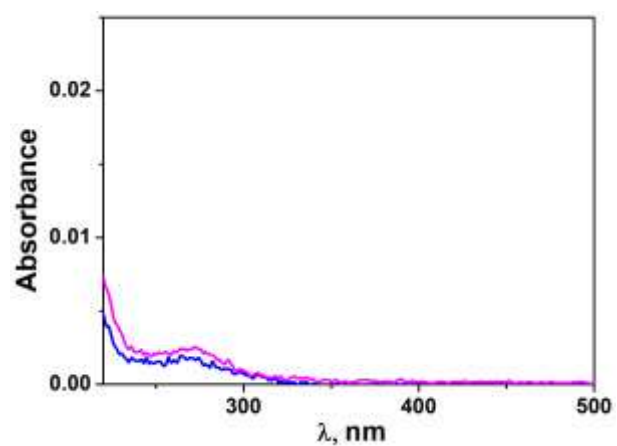

**Figure S12.** UV Absorbance spectra of PTE after ultracentrifugation of erythrocyte coated PTE-polymersome microreactor, 10mM Tris/NaCl (0.9%) buffer, pH = 7.4,  $C_1 = 5$  mg/mL, 25 °C.

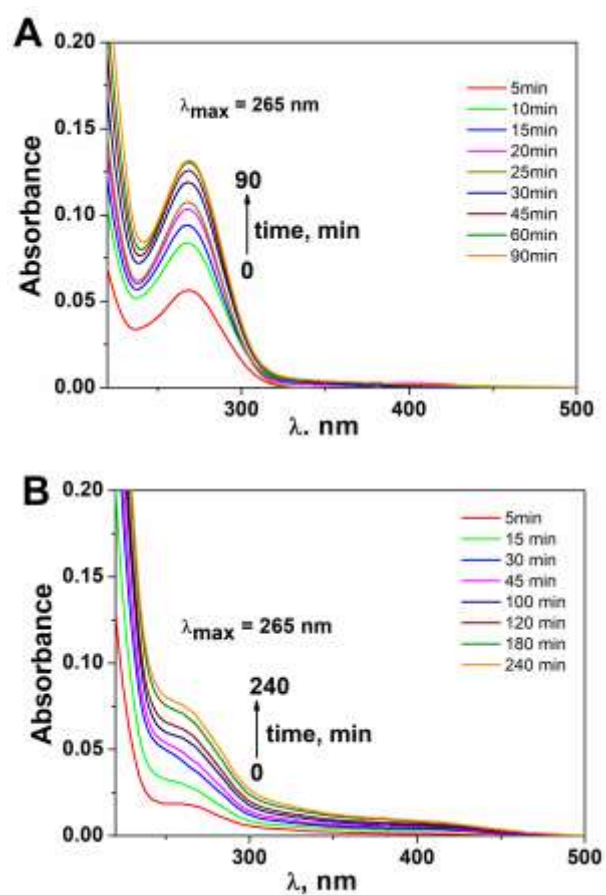

**Figure S13.** UV Absorbance spectra of PTE (A) control (none capsulated); (B) released from erythrocyte coated PTE-polymersome microreactor (B), monitored by dialysis method during time, 10mM Tris buffer, pH=7.4, 25°C.

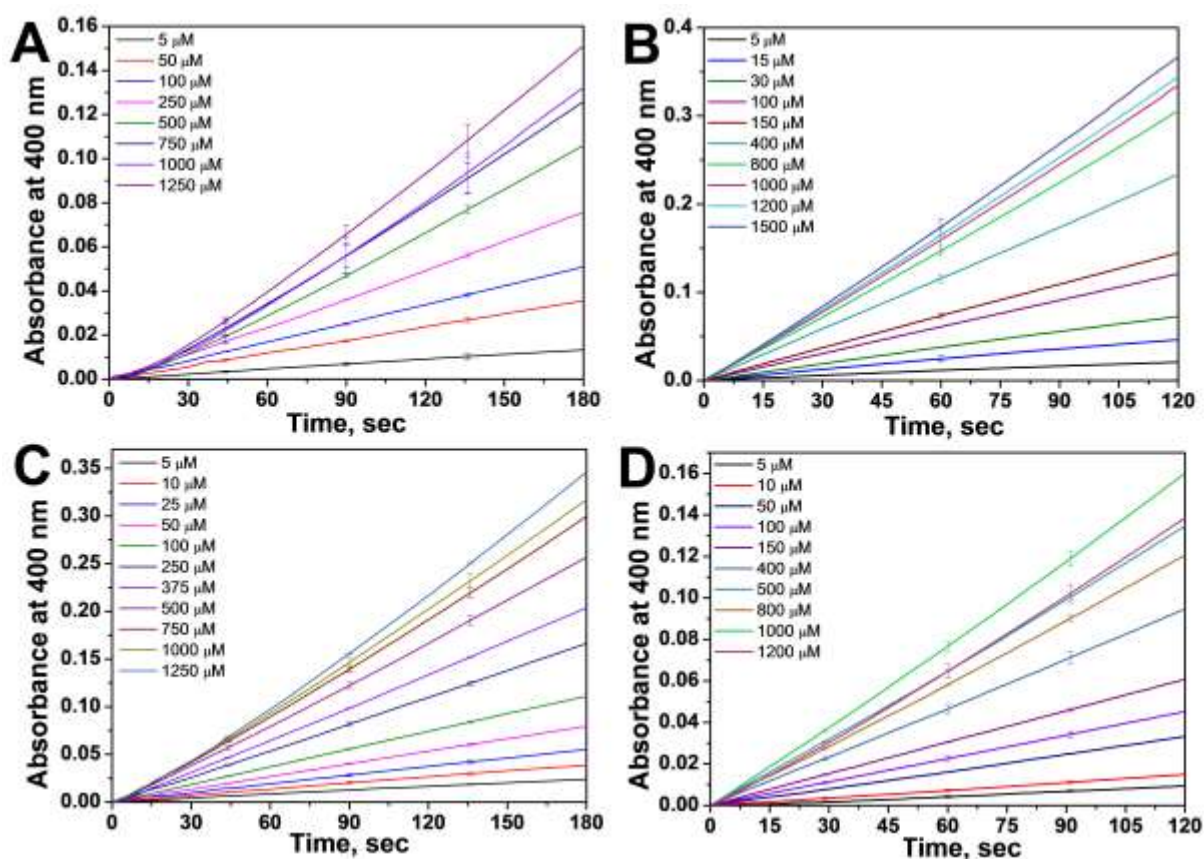

**Figure S14.** Kinetic curves of POX hydrolysis by free PTE (A), PTE-loaded in polymersomes (B), erythrocyte-modified PTE-polymersomes (C), erythrocyte-coated PTE-polymersome microreactors,  $C_{\text{PTE}} = 3.125 \text{ nM}$  in 10 mM Tris buffer containing  $\text{CoCl}_2$  ( $C=0.0002 \text{ M}$ ) and ethanol 1.5% (vol.), pH = 7.4, 25 °C.

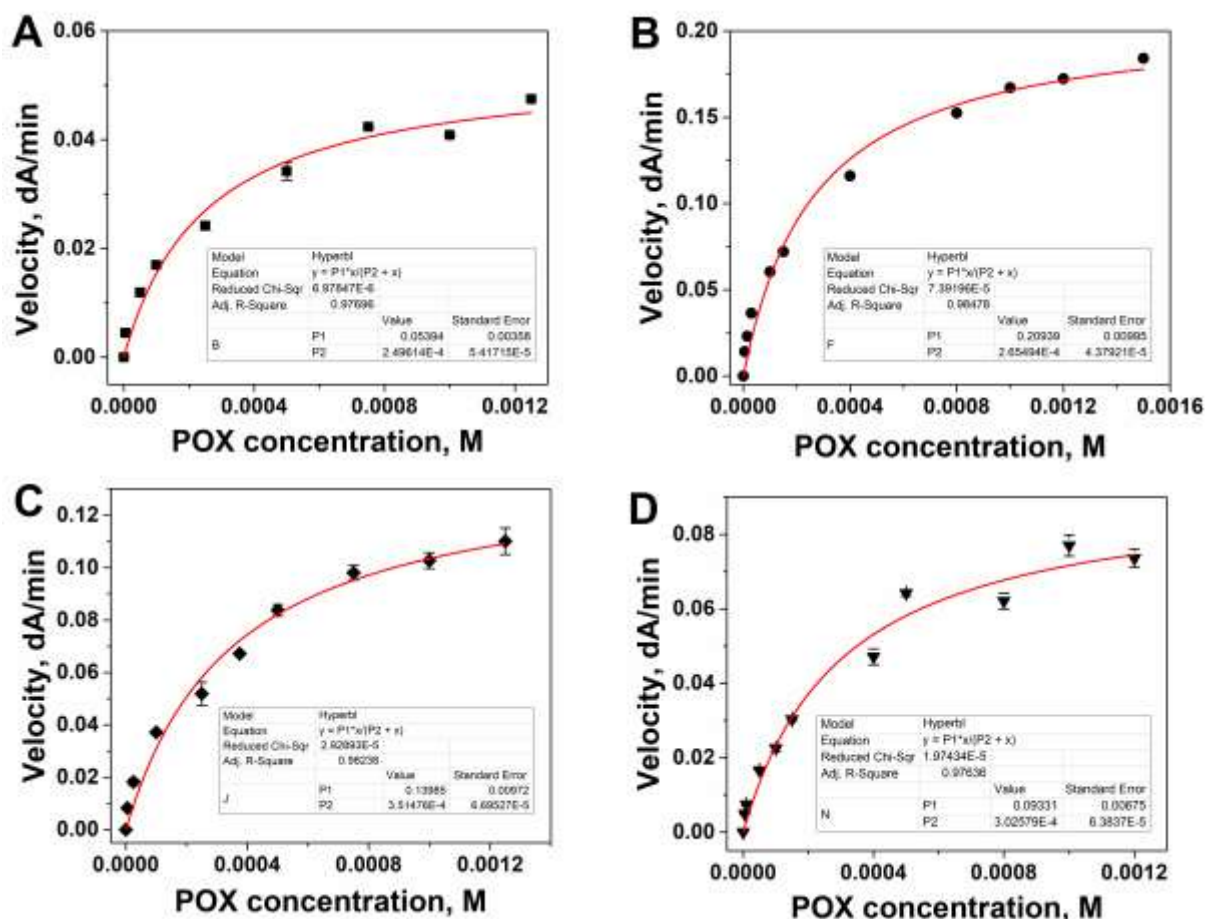

**Figure S15.** Dependences of POX hydrolysis by PTE (A), PTE-loaded polymersomes (B), erythrocyte-modified PTE-polymersomes (C), erythrocyte coated PTE-polymersome microreactors (D) on POX concentration in 10 mM Tris buffer containing  $\text{CoCl}_2$  ( $C=0.0002$  M) and ethanol 1.5% (vol.), pH = 7.4, 25 °C.

**Table S2.** Prophylaxis and post-exposure treatment of paraoxon *s.c.* acute toxicity by *i.v.* administration of PTE-loaded nanoreactors in mice.

| Dose,<br>mg/kg                                                        | Animals<br>dead / total |
|-----------------------------------------------------------------------|-------------------------|
| Paraoxon acute toxicity study                                         |                         |
| 0.25                                                                  | 0/3                     |
| 0.5                                                                   | 1/3                     |
| 0.65                                                                  | 1/3                     |
| 0.7                                                                   | 3/3                     |
| PTE-loaded polymersomes prophylactic <i>i.v.</i> administration       |                         |
| 5                                                                     | 0/3                     |
| 7.5                                                                   | 2/3                     |
| 10                                                                    | 2/3                     |
| 15                                                                    | 3/3                     |
| PTE-loaded polymersomes <i>i.v.</i> treatment                         |                         |
| 2.5                                                                   | 0/3                     |
| 5                                                                     | 2/3                     |
| 10                                                                    | 3/3                     |
| Erythrocyte-PTE-microreactors prophylactic <i>i.v.</i> administration |                         |
| 1.5                                                                   | 0/3                     |
| 2.5                                                                   | 0/3                     |
| 5                                                                     | 1/5                     |
| 7                                                                     | 1/3                     |
| 10                                                                    | 3/3                     |
| Erythrocyte-PTE-microreactors <i>i.v.</i> treatment                   |                         |
| 1.5                                                                   | 0/3                     |
| 2.5                                                                   | 0/3                     |
| 5                                                                     | 3/5                     |
| 7                                                                     | 2/3                     |

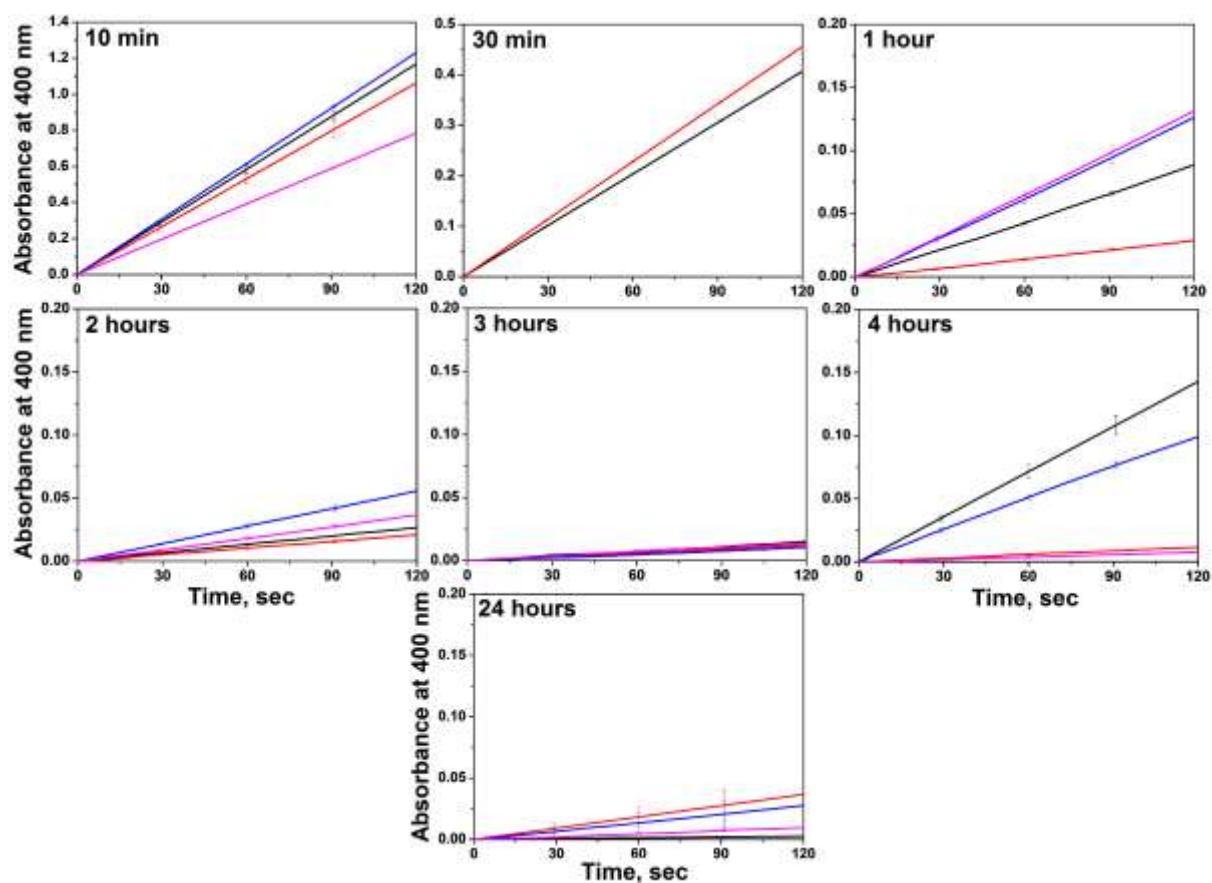

**Figure S16.** Kinetics of the paraoxon hydrolysis by erythrocyte coated PTE-polymersomes microreactors in mouse plasma in the pharmacokinetic study. 10 mM Tris buffer containing  $\text{CoCl}_2$  ( $C=0.0002$  M),  $\text{pH} = 7.4$ ,  $C_{\text{Paraoxon}} = 1$  mM,  $25^\circ\text{C}$ .

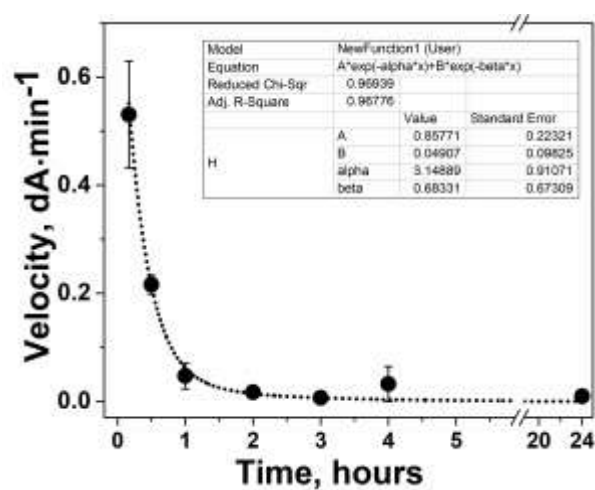

**Figure S17.** Fitting to the two-compartment model the pharmacokinetic plot of PTE in mouse plasma after intravenous injection of erythrocyte coated PTE-polymersome microreactors. PTE dose 3.7 mg/kg, block-copolymer dose 25 mg/kg. Each point represents the mean  $\pm$  SD in four mice.
